# Supplementary material
Source: PubMed Central journal article supplement (PMC3000581)
Supplement: tjp0588-3901-SD1.pdf [file tjp0588-3901-SD1.pdf]

FOR PUBLICATION

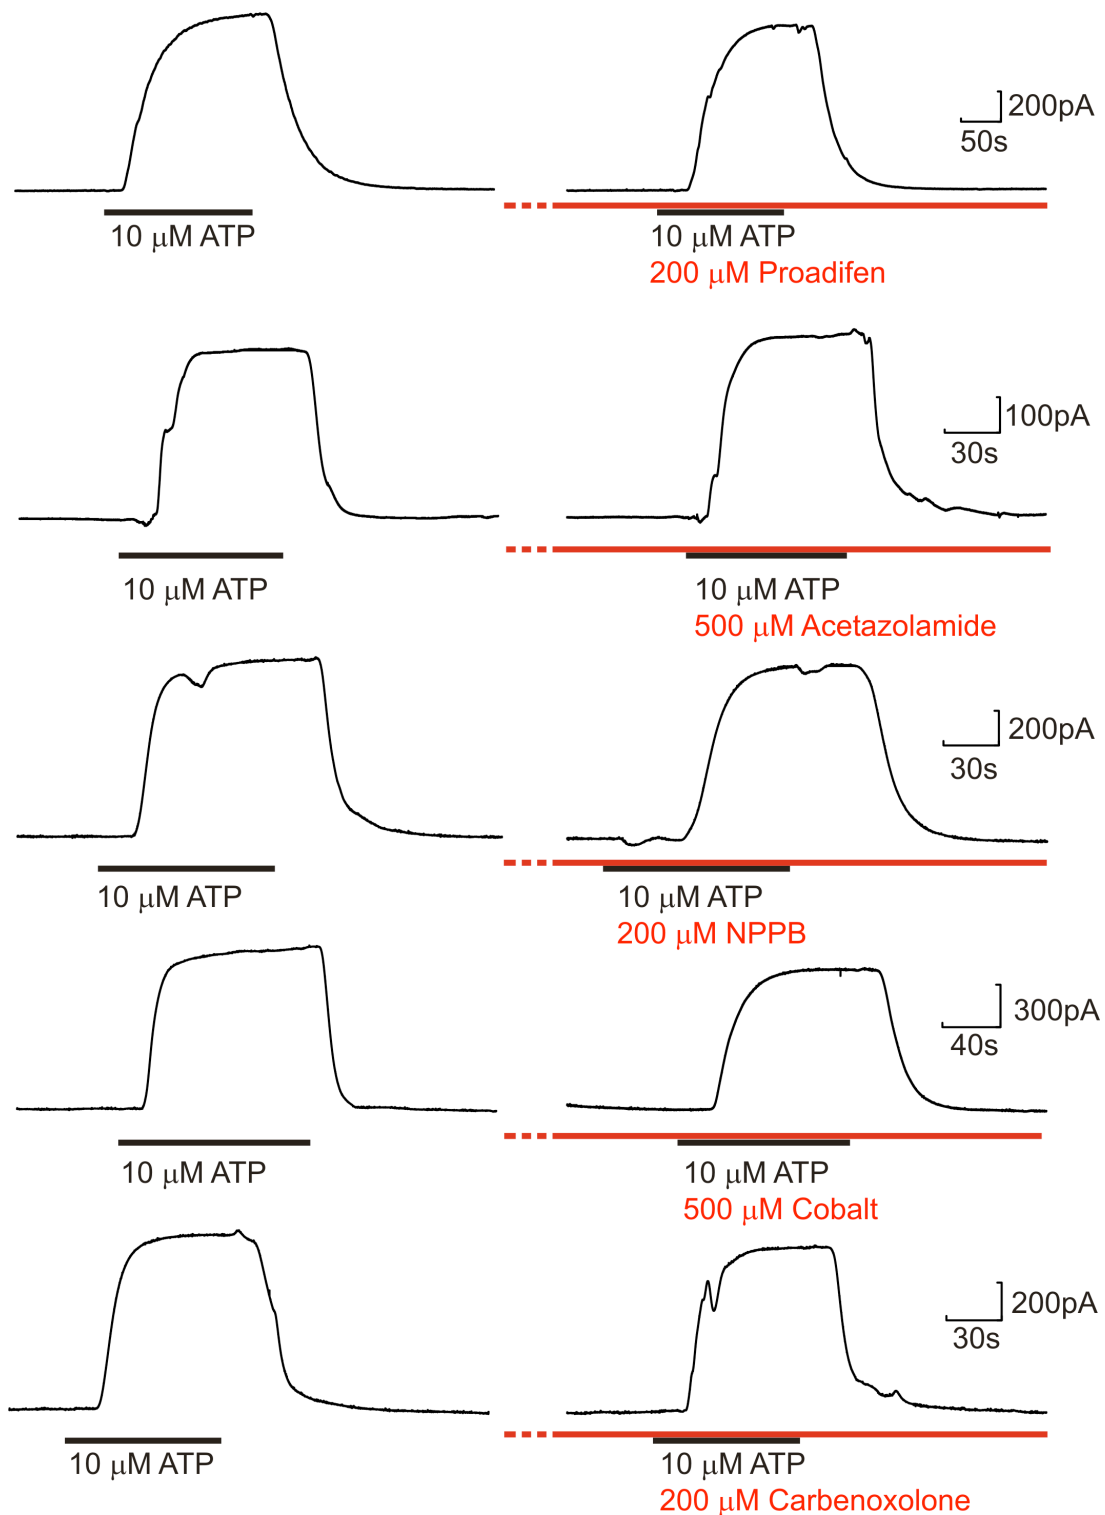

**Supplementary Figure 1. The pharmacological agents used in the study do not significantly affect biosensor responses to ATP.** Biosensors were calibrated with ATP in control aCSF, and then recalibrated in the presence of the relevant pharmacological agents.

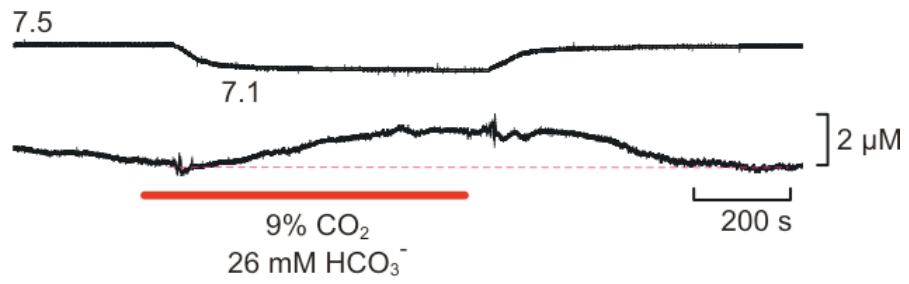

**Supplementary Figure 2. ATP release evoked by hypercapnic acidosis.** Upper trace - continual bath pH recording, lower trace - net ATP signal.
